# Supplementary material
Source: PubMed Central journal article supplement (PMC4789779)
Supplement: NIHMS766041-supplement-01.pdf [file NIHMS766041-supplement-01.pdf]

**Video 1 – INSERT VIDEO GRAPHIC 1.** See supplemental digital content 1, which displays the lateral arm flap for reconstruction of a dorsal soft-tissue defect of the hand. This video is available in the “Related Videos” section of the Full-Text article on PRSJournal.com or available at **INSERT LINK HERE.**

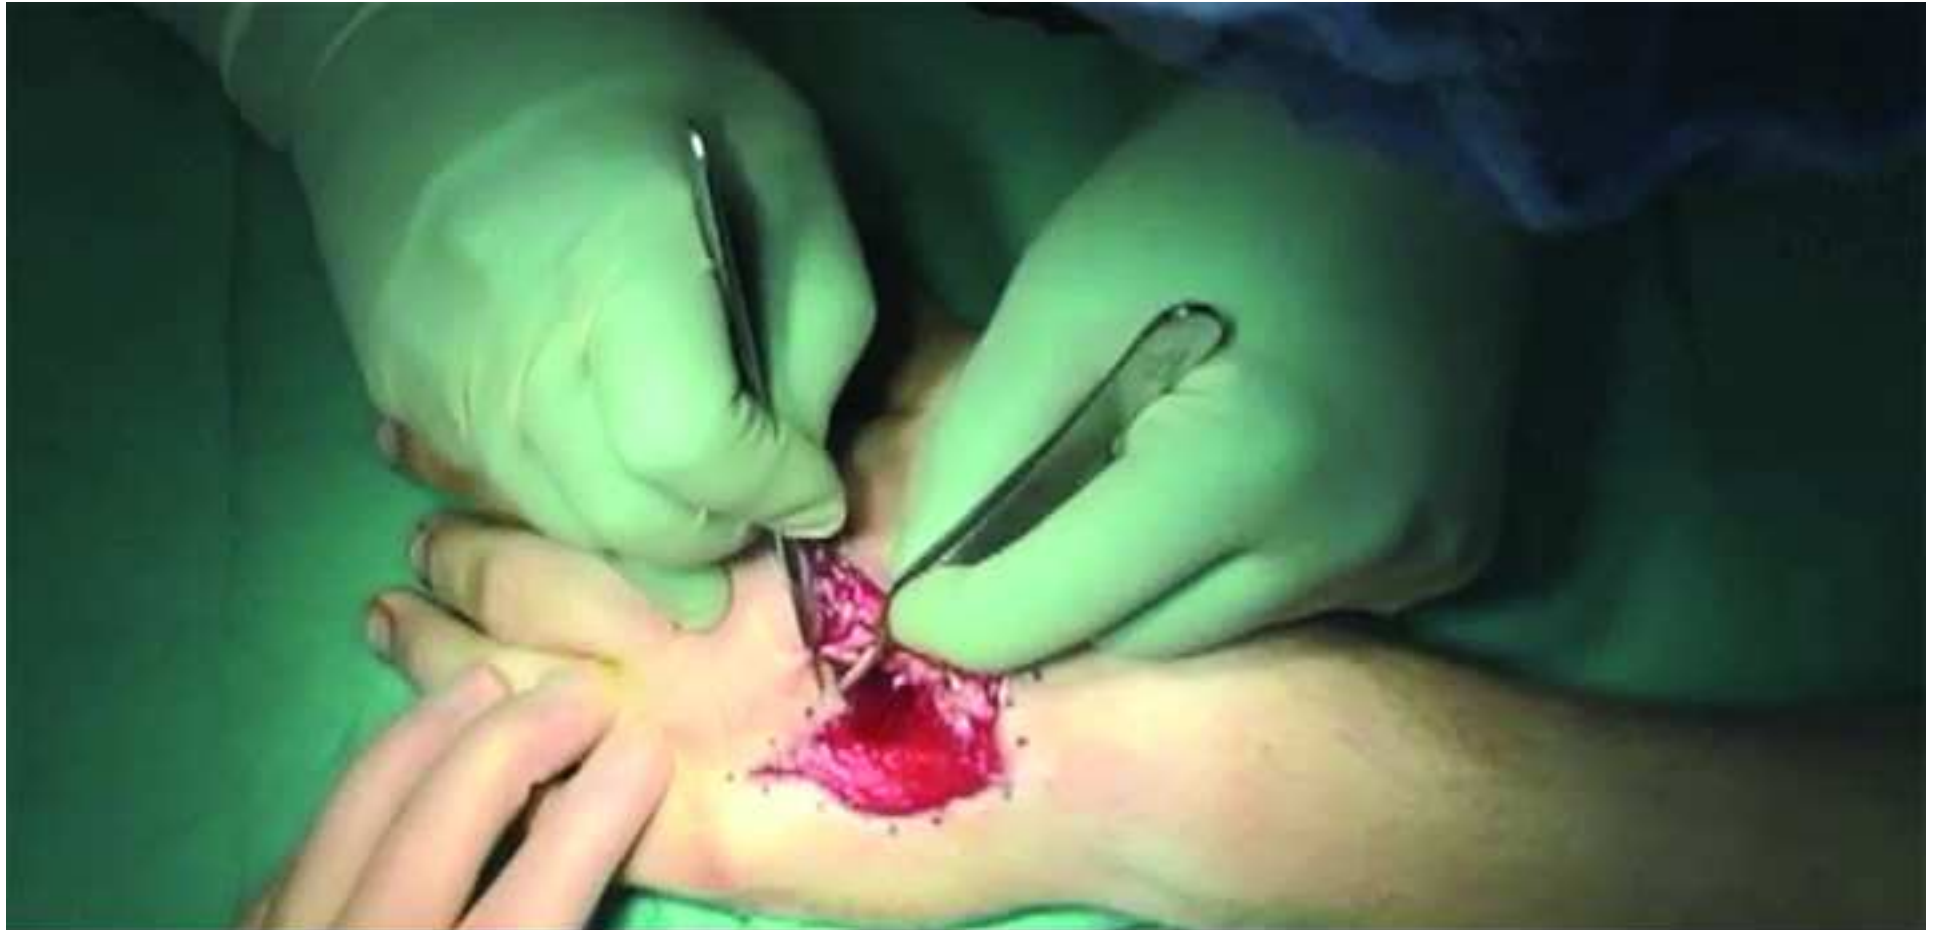

 Video Available Online

Video

[Click here to download Video: Video1.mp4](#)
